# Supplementary material for: Carotid Artery-Cavernous Segment Injury during an Endoscopic Endonasal Surgery: A Case Report and Literature Review of the Overlooked Option for Surgical Trapping in the Hyperacute Phase
Source: PubMed Central journal article supplement — J Neurol Surg Rep. 2021 Dec 14;82(4):e53–62. doi: 10.1055/s-0041-1740511 (PMC8670996; doi:10.1055/s-0041-1740511), 2021-12-14
Supplement: 10-1055-s-0041-1740511-s210012.pdf [file 10-1055-s-0041-1740511-s210012.pdf]

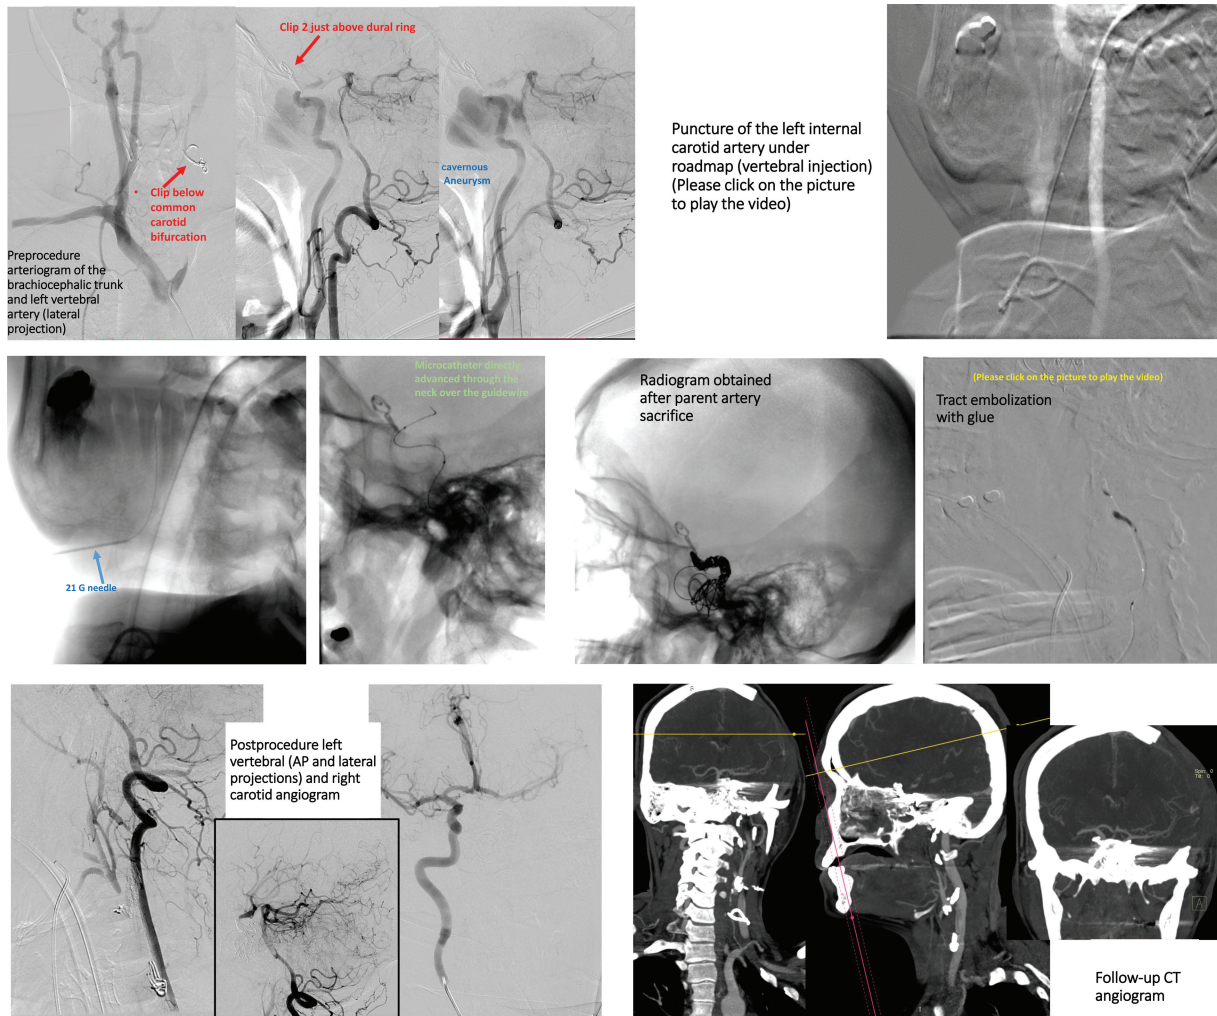

**Supplementary file 1** Figures of the embolization procedure. AP, anteroposterior; CT, computed tomography. The steps of the embolization. The cerebral angiogram demonstrated reconstitution of ICA flow inferiorly (u pline, left side) and puncture of the left internal carotid artery (up line, right side). Surgically occluded ICA is direct punctured at the cervical segment (middle line, first and second figures). Angiogram after parent artery is sacrificed (middle line, third figure). The tract of embolization (middle line, last figure). At the end of the procedure, both aneurysm and neighboring left ICA segment occlusion were demonstrated and left intracranial carotid circulation reconstruction was verified in angiograms (down line, left side). In follow up, persistent pseudoaneurysm and parent artery occlusion was observed (down line, right side). AP, anteroposterior; CT, computed tomography.
